# Supplementary material for: Delivery of VP1 siRNA to inhibit the EV71 virus using functionalized silver nanoparticles through ROS-mediated signaling pathways
Source: Royal Society of Chemistry journal article supplement (doi:10.1039/c6ra26472g), 2017-01-01
Supplement: c6ra26472g1.pdf [file c6ra26472g1.pdf]

### Supporting Information

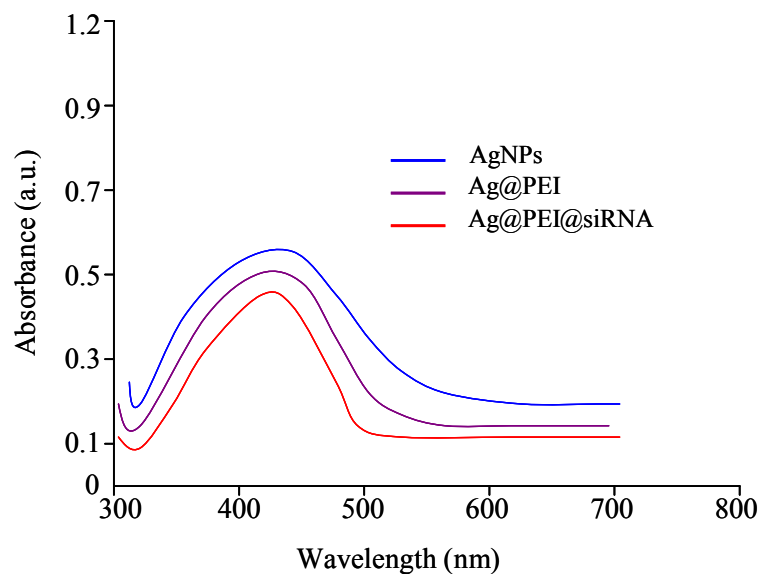

**Figure S1.** The formation of silver nanoparticles was achieved as evidenced by UV-vis spectroscopy. The UV-vis analysis clearly indicated the formation of silver nanoparticles by the appearance of strong absorption bands at 420 nm. The observation of absorption bands at this wavelength demonstrates the formation of spherical AgNPs.

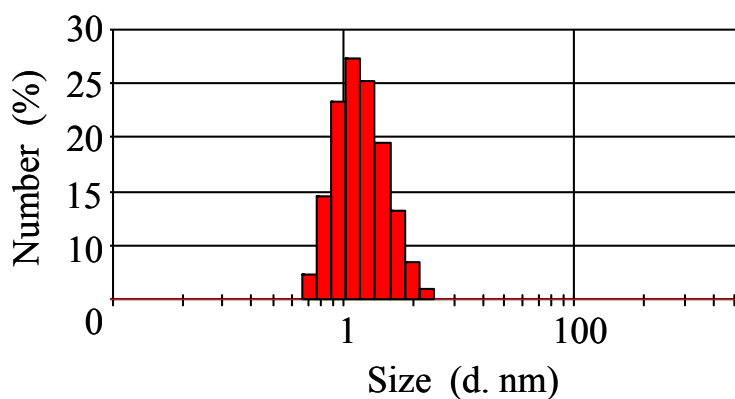

**Figure S2.** Poly dispersity index (PDI) was determined by dynamic light scattering (Zetasizer Nano, Malvern). The PDI value of Ag@PEI@siRNA is 0.065.
